# Supplementary material for: Repeatome Analyses and Satellite DNA Chromosome Patterns in Deschampsia sukatschewii, D. cespitosa, and D. antarctica (Poaceae)
Source: MDPI journal article supplement (doi:10.3390/genes13050762), 2022-04-26
Supplement: s1 [file s1]

**Table S1.** FISH chromosome mapping of the *D. sukatschewii* satDNA probes in the studied *Deschampsia* species

| SatDNA Probe | <i>D. sukatschewii</i>                                                                                                                                            | <i>D. cespitosa</i>                                                                                                                                                    | <i>D. antarctica</i>                                                                                                                                                                   |
|--------------|-------------------------------------------------------------------------------------------------------------------------------------------------------------------|------------------------------------------------------------------------------------------------------------------------------------------------------------------------|----------------------------------------------------------------------------------------------------------------------------------------------------------------------------------------|
| Ds 52        | Multiple clustered and dispersed hybridization signals localized in different chromosome regions, partially overlapping with Ds 81 and Ds 56 signals              | Multiple clustered and dispersed signals localized in different chromosome regions, overlapping with Ds 81 and Ds 56 signals                                           | Four clustered signals localized on chromosome pairs 5 (distal region of the satellite) and 12 (distal region of the long arm), overlapping with Ds 81 and Ds 56 signals               |
| Ds 56        | Multiple clustered and dispersed signals localized in different chromosome regions, partially overlapping with Ds 81 and Ds 52 signals                            | Multiple clustered and dispersed signals localized in different chromosome regions, overlapping with Ds 81 and Ds 52 signals                                           | Four clustered signals localized on chromosome pairs 5 (distal region of the satellite) and 12 (distal region of the long arm), overlapping with Ds 81 and Ds 52 signals               |
| Ds 65        | Middle-sized clustered signals localized in terminal regions of chromosome pairs 3, 10 and 13, and also in pericentromeric regions of chromosome pairs 1, 2 and 7 | Middle-sized clustered signals localized in terminal regions of chromosome pairs 3, 10, 11, 12 and 13, and also in pericentromeric regions of chromosome pairs 2 and 7 | Middle-sized clustered signals localized in terminal regions of chromosome pairs 1, 7, 8, 11 and 13, and also in pericentromeric regions of chromosome pairs 2, 3 and 6                |
| Ds 81        | Multiple clustered and dispersed hybridization signals localized in different chromosome regions, partially overlapping with Ds 52 and Ds 56 signals              | Multiple clustered and dispersed hybridization signals localized in different chromosome regions, overlapping with Ds 52 and Ds 56 signals                             | Four clustered hybridization signals localized on chromosome pairs 5 (distal region of the satellite) and 12 (distal region of the long arm), overlapping with Ds 52 and Ds 56 signals |
| Ds 83        | Multiple clustered signals localized in the distal regions of most chromosomes                                                                                    | Multiple clustered signals localized in the distal regions of most chromosomes                                                                                         | Multiple clustered signals localized in the distal regions of most chromosomes                                                                                                         |
| Ds 88        | Multiple very small clusters and dispersed signals localized along most chromosomes                                                                               | Middle-sized clustered signals localized in the terminal regions (seven chromosome pairs) and also in pericentromeric regions of one large chromosome pair             | Small and middle-sized clustered signals localized in different chromosome positions of eight chromosome pairs                                                                         |
| Ds 124       | Multiple clustered and dispersed hybridization signals localized in different chromosome regions                                                                  | Multiple clustered and dispersed hybridization signals localized in different chromosome regions                                                                       | Clustered signals localized in the proximal regions of the long arms of chromosome pair 11                                                                                             |
| Ds 138       | Very small clustered and dispersed signals localized along most chromosomes                                                                                       | Small and middle-sized clustered signals localized in different chromosome position of seven chromosomes pairs                                                         | Multiple small and middle-sized clusters localized in different chromosome positions and also dispersed signals detected along most chromosomes                                        |
| Ds 144       | Multiple small and middle-sized clustered signals localized in different chromosome positions and                                                                 | Multiple small clustered and dispersed signals localized along most chromosomes                                                                                        | Multiple small and middle-sized clustered signals localized in different chromosome positions                                                                                          |

|        |                                                                                                                          |                                                                                                                                         |                                                                                                                                          |
|--------|--------------------------------------------------------------------------------------------------------------------------|-----------------------------------------------------------------------------------------------------------------------------------------|------------------------------------------------------------------------------------------------------------------------------------------|
|        | also dispersed signals detected along most chromosomes                                                                   |                                                                                                                                         |                                                                                                                                          |
| Ds 146 | Middle-sized clustered signals localized in different chromosome positions of chromosome pairs 1, 2, 4, 7, 8, 11 and 13  | Middle-sized and small clustered signals localized in different chromosome positions of chromosome pairs 1, 2, 3, 4, 7, 8, 9, 11 and 13 | Large and middle-sized clustered signals localized in different chromosome positions of chromosome pairs 1, 2, 3, 4, 6, 7, 11, 12 and 13 |
| Ds 179 | Multiple very small clusters and dispersed signals localized along most chromosomes                                      | Small and middle-sized clustered signals localized on seven chromosome pairs in different chromosome positions                          | Middle-sized clustered signals localized in terminal regions of four chromosome pairs                                                    |
| Ds 226 | Middle-sized clusters localized on eight chromosome pairs in different positions and dispersed signals along chromosomes | Multiple small clusters and dispersed signals localized along most chromosomes                                                          | Large and middle-sized clustered signals localized on nine chromosome pairs in different chromosome positions                            |

---
